# Supplementary material for: A genetically-engineered von Willebrand disease type 2B mouse model displays defects in hemostasis and inflammation
Source: PubMed Central journal article supplement (PMC4876317; doi:10.1038/srep26306), 2016-05-23
Supplement: srep26306-s1.pdf [file srep26306-s1.pdf]

**SREP-16-08580 Supplementary information**

**A genetically-engineered von Willebrand disease type 2B mouse model displays defects in hemostasis and inflammation**

Frédéric Adam<sup>1</sup>, Caterina Casari<sup>1</sup>, Nicolas Prévost<sup>2</sup>, Alexandre Kauskot<sup>1</sup>, Cécile Loubière<sup>1</sup>, Paulette Legendre<sup>1</sup>, Christelle Repérant<sup>1</sup>, Dominique Baruch<sup>3,4</sup>, Jean-Philippe Rosa<sup>1</sup>, Marijke Bryckaert<sup>1</sup>, Philip G. de Groot<sup>5</sup>, Olivier D. Christophe<sup>1,\*</sup>, Peter J. Lenting<sup>1</sup>, Cécile V. Denis<sup>1</sup>

<sup>1</sup>Institut National de la Santé et de la Recherche Médicale, UMR\_S 1176, Univ. Paris-Sud, Université Paris-Saclay, 94276 Le Kremlin-Bicêtre, France

<sup>2</sup>Kyoto Gakuen University, Kameoka, Japan

<sup>3</sup>INSERM UMR\_S1140, 75006 Paris, France

<sup>4</sup>University Paris-Descartes, 75006 Paris, France

<sup>5</sup>Department of Clinical Chemistry and Haematology, University of Utrecht, University Medical Center Utrecht, Utrecht, The Netherlands.

Supplementary Results:*VWF antigen levels over time :*

There was no difference in VWF antigen levels between WT-, HET- and KI-mice. Levels averaged from 61% to 103% compared to a C57BL/6 murine plasma set at 100%.

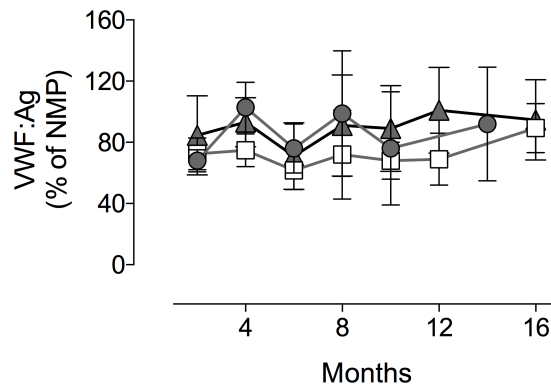

Figure S1 : Follow-up of VWF:Ag over time. Means  $\pm$  SD measured in WT (triangles), HET (open squares) and KI-(circles) mice. NMP: Normal mouse plasma.

*Platelet counts over time :*

When looking at how platelet counts were evolving over time, we did not see any statistical differences in HET and KI ( $p=0.15$  and  $p=0.39$  ; 1-way ANOVA followed by Dunnett's test) mice between 2 and 14-16 months. In WT mice, a trend analysis performed *via* ANOVA revealed that platelet counts were increasing over time ( $p=0.0005$ ).

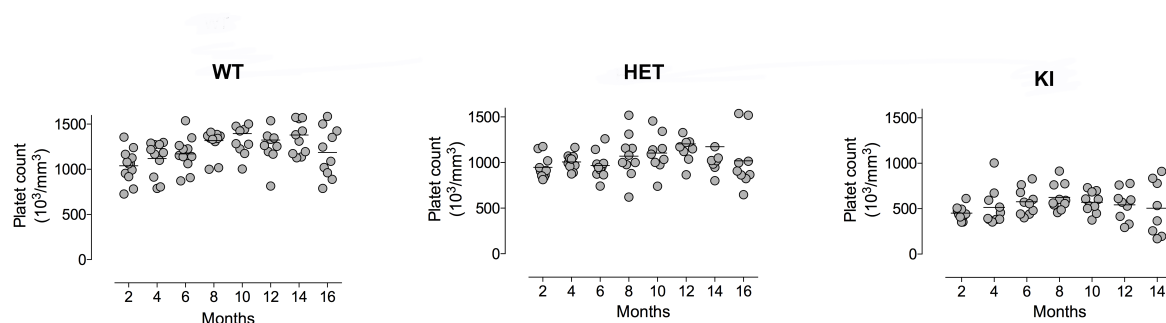

Figure S2 : Follow-up of platelet counts over time.

*Platelet volume over time :*

Platelet volume did not significantly evolve over time. The statistical difference between KI-, WT- or HET-mice (see Fig. 2B) remained steady at all time-points. Between HET- and WT-mice, differences were statistically significant at all time-points except the 4 month time-point.

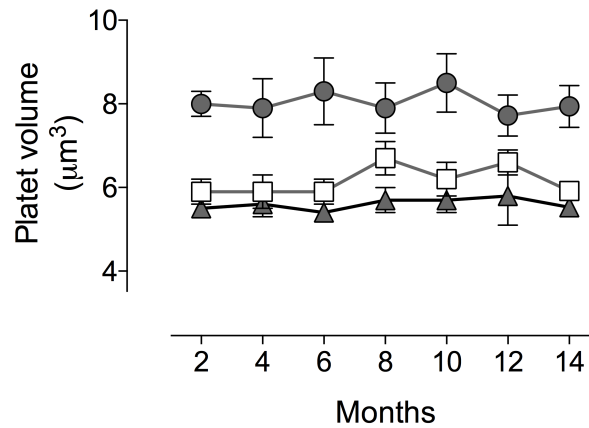

Figure S3 : Follow-up of platelet volume over time. Means  $\pm$  SD measured in WT- (triangles), HET- (open squares) and KI-(circles) mice.

*Perfusion of platelets over freshly released VWF*

Perfusion of fixed platelets over VWF secreting endothelial cells resulted in the formation of platelet-decorated VWF-strings (Fig. S4). For VWF secreted from wild-type human umbilical vein endothelial cells (WT-HUVECs), the mean platelet coverage was  $0.15 \pm 0.03$  platelets/ $\mu\text{m}$  (mean $\pm$ SD; n=6 experiments; Fig. S4A). Interestingly, platelet adhesion was markedly increased when platelets were perfused over HUVECs expressing VWF/p.R1306Q:  $0.35 \pm 0.11$  platelets/ $\mu\text{m}$  (n=6; p=0.0057; Unpaired two-tailed t test with Welch's correction; Fig. S4B).

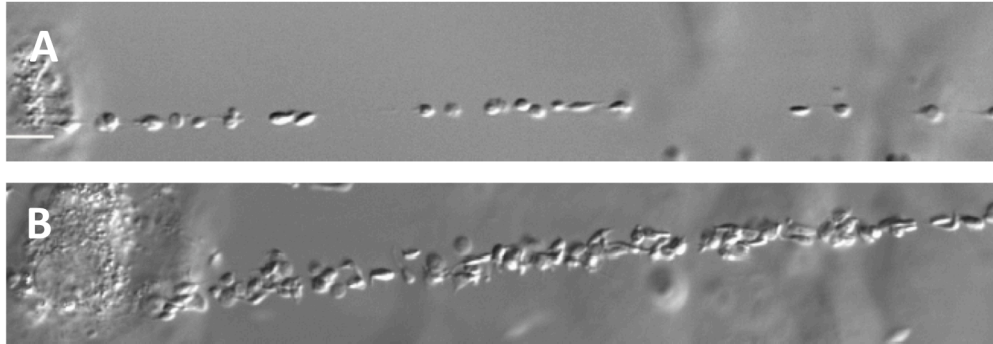

Figure S4 : Fixed human platelets were perfused over WT-HUVECs (panel A) and HUVECs obtained from a newborn homozygous for the VWD-type 2B mutation p.R1306Q (panel B). Bar represents 8  $\mu\text{m}$ .

*Supplementary methods belonging to supplementary figure S4:* HUVECs from healthy newborns and from a homozygote newborn with VWD-type 2B (mutation p.R1306Q) were isolated as described<sup>1</sup> and cultured in endothelial basal medium (EBM)-2 supplemented with EGM-2 bulletkits (Lonza, Walkersville, MD, USA). For perfusion studies, HUVECs were grown on glass cover slips till >80% confluence. Prior to perfusion, coverslips were washed once in Medium 199 (Hyclone/ThermoFischer, Waltham, MA, USA). Fixed platelets (150.000/ $\mu\text{L}$ ) were perfused over the cells at a shear rate of 300  $\text{s}^{-1}$  as described<sup>2</sup>. Formation of VWF strings was visualized using an Axio Observer Microscope (Zeiss, Oberkochen, Germany). After 2.5 minutes of perfusion, a snapshot was taken for quantification of the amount of platelets that adhered to VWF. Platelet adhesion is expressed a number of platelets/ $\mu\text{m}$  of string. Each experiment was analyzed independently by two individuals.

#### *Self-association of VWF-fragments to full-length VWF*

When testing for binding of A1-Fc or A1-A2-A3-HPC4 to wt-VWF, we could not detect any interaction in our conditions. In contrast, a dose-dependent association of both VWF-

fragments to VWF/p.V1316M became apparent. This suggests that the type 2B mutation p.V1316M promotes inter-molecular VWF-VWF interactions.

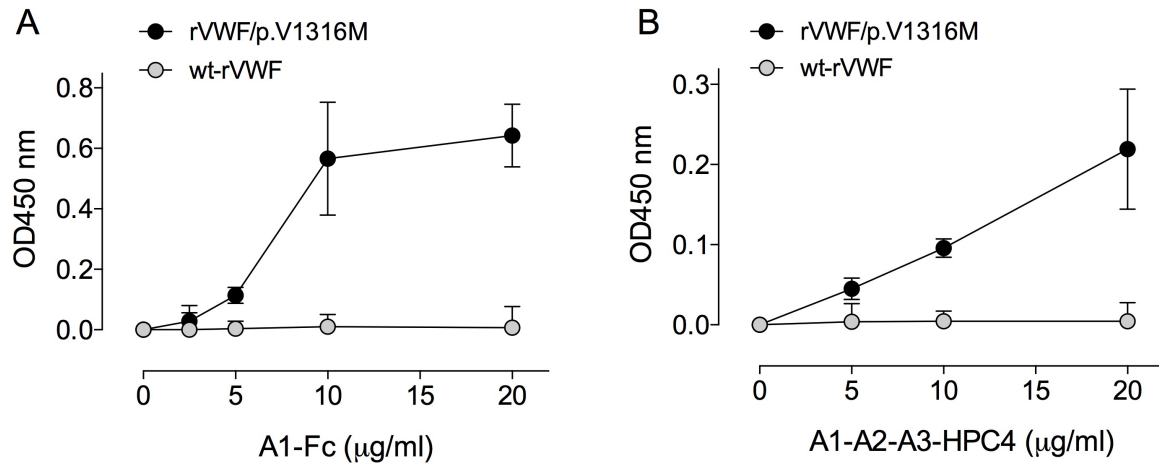

Figure S5: Self-association of VWF-fragments to full-length VWF. Dose-dependent association of the VWF A1-Fc fragment (panel A) or the VWF A1-A2-A3-HPC4 fragment (panel B) to the type 2B mutant VWF/p.V1316M. No relevant binding to wt-VWF could be detected under these conditions.

*Supplementary methods belonging to supplementary figure S5:* Culture medium containing full-length recombinant wt-VWF or VWF/p.V1316M (both 1 µg/mL final concentration) were incubated with either purified A1-Fc or A1-A2-A3-HPC4 (both 0-20 µg/mL) in Tris-buffered saline in eppendorf tubes. Binding is allowed to proceed for 15 minutes at room temperature on a MixMate® PCR mixer (Eppendorf, Montesson, France) at a rotation rate of 1,500 rpm. Samples were then transferred to microtiter-wells coated with the in-house made anti-D'D3 antibody Mab418 (5 µg/well) to catch VWF and VWF-fragment complexes. To prevent complexes from dissociating, the microtiter plate was also subjected to rotation on the MixMate® at 500 rpm. After washing to remove unbound protein, complexes were probed using peroxidase-labeled anti-human Fc or anti-HPC4 antibodies.

*Determination murine ADAMTS13 activity*

No significant difference in ADAMTS13 activity was measured between mice of the three genotypes.

Table S1 ADAMTS13 activity in WT-, HET- and KI-mice

|     | % ADAMTS13 activity | SEM | N  |
|-----|---------------------|-----|----|
| WT  | 109.4               | 2.6 | 8  |
| HET | 101.0               | 3.0 | 10 |
| KI  | 108.7               | 4.8 | 10 |

Supplementary References :

- 1 Willems, C. *et al.* Media conditioned by cultured human vascular endothelial cells inhibit the growth of vascular smooth muscle cells. *Experimental cell research* **139**, 191-197 (1982).
- 2 Sixma, J. J., de Groot, P. G., van Zanten, H. & M, I. J. A new perfusion chamber to detect platelet adhesion using a small volume of blood. *Thrombosis research* **92**, S43-46 (1998).
